1

2 **N-terminal BRCT domains of the DNA damage checkpoint**  
3 **proteins TOPBP1/Rad4 display distinct specificities for**  
4 **phosphopeptide ligands**

5

6 Matthew Day<sup>1</sup>, Mathieu Rappas<sup>1,2</sup>, Katie Ptasińska<sup>3</sup>, Dominik Boos<sup>4</sup>, Antony W. Oliver<sup>1\*</sup> and  
7 Laurence H. Pearl<sup>1\*</sup>

8

- 9 1. Cancer Research UK DNA Repair Enzymes Group, Genome Damage and Stability  
10 Centre, School of Life Sciences, University of Sussex, Falmer, Brighton BN1 9RQ, UK
- 11 2. Present address: Heptares Therapeutics Ltd, BioPark, Broadwater Road, Welwyn  
12 Garden City, Hertfordshire AL7 3AX, UK
- 13 3. Genome Damage and Stability Centre, School of Life Sciences, University of Sussex,  
14 Falmer, Brighton BN1 9RQ, UK
- 15 4. Fakultät für Biologie, Room S05 R02 H87, Universität Duisburg-Essen, 45117 Essen,  
16 Germany

17

18 \* corresponding authors

19

20 Tel: +44 1273 678349; Fax: +44 1273 678121; E-mail: [antony.oliver@sussex.ac.uk](mailto:antony.oliver@sussex.ac.uk)

21 Tel: +44 1273 876544; Fax: +44 1273 878586; E-mail: [laurence.pearl@sussex.ac.uk](mailto:laurence.pearl@sussex.ac.uk)

22

## 1 **Abstract**

2 TOPBP1 and its fission yeast homologue Rad4, are critical players in a range of DNA  
3 replication, repair and damage signalling processes. They are composed of multiple BRCT  
4 domains, some of which have the capacity to bind phosphorylated motifs in other proteins.  
5 They thus act as multi-point adaptors bringing proteins together into functional combinations,  
6 dependent on post-translational modifications downstream of cell cycle and DNA damage  
7 signals. We have now structurally and/or biochemically characterised a sufficient number of  
8 high-affinity complexes for the conserved N-terminal region of TOPBP1 and Rad4 in complex  
9 with diverse phospho-ligands – which include human RAD9 and Treslin, as well as *S.pombe*  
10 Crb2 and Sld3 – to define the key determinants of BRCT domain specificity. We use this  
11 information to identify and characterise previously unknown phosphorylation-dependent  
12 TOPBP1/Rad4-binding motifs in human RHNO1 and the fission yeast homologue of MDC1,  
13 Mdb1. These results provide important insights into how multiple BRCT domains within  
14 TOPBP1/Rad4 achieve selective and combinatorial binding of their multiple partner proteins.

15

16

## 1 **Introduction**

2 TOPBP1 and its fission and budding yeast orthologues Rad4 and Dpb11, respectively, are  
3 scaffold proteins that mediate formation of multi-protein complexes in a range of essential  
4 DNA replication and repair processes (Wardlaw et al., 2014). Homologues in vertebrates  
5 each contain nine BRCT domains, of which four (at the N-terminus; BRCT1,2 and 4,5) are  
6 conserved in the yeasts (Garcia et al., 2005). In addition, all members of the family possess  
7 a domain required for activation of the DNA damage PI3-kinase-like kinase ATR (Kumagai  
8 et al., 2006; Lin et al., 2012; Mordes et al., 2008a; Mordes et al., 2008b). In TOPBP1, this is  
9 located between BRCT domains 5 and 6, while in the yeast proteins it occurs at the C-  
10 terminus, downstream of BRCT4 (Wardlaw et al., 2014).

11 Bioinformatic analysis (Rappas et al., 2011; Wardlaw et al., 2014) suggests that only three of  
12 the BRCT domains in the yeast TOPBP1 homologues, and four in the vertebrate TOPBP1  
13 homologues, possess the required cluster of residues needed to bind phosphorylated peptide  
14 motifs. Despite the structural similarity of these phosphopeptide-binding BRCT domains  
15 (Leung et al., 2011; Leung et al., 2013; Qu et al., 2013; Rappas et al., 2011; Sun et al., 2017),  
16 genetic and biochemical studies show that they are nonetheless selective and specific for the  
17 phosphopeptide sequences with which they interact. However, the structural basis for this  
18 specificity has not been defined.

19 To gain some insight into this, we have determined crystal structures of segments of yeast  
20 and vertebrate TOPBP1 that contain the two most N-terminal phosphopeptide binding sites  
21 (BRCT1 and BRCT2), in complex with phosphopeptides derived from a number of different  
22 known ligand proteins, including RAD9, and used this to develop consensus patterns that  
23 encapsulate the individual specificity requirements of these two independent binding sites.  
24 We have used these patterns to predict interacting phospho-peptides from putative ligand

1 proteins in vertebrates and yeast, and have characterised their specific interactions  
2 structurally, biochemically, and biologically. These data provide insights into how TOPBP1  
3 homologues can differentiate between closely related phosphopeptide motifs, allowing them  
4 to act as multi-point scaffolds that bring ligand proteins together into specific functional  
5 assemblies for DNA replication and repair.

6

7

8

## 1 Results

### 2 Structural basis for RAD9 binding to TOPBP1

3 Phosphorylation of RAD9 on Ser387 (or its equivalent) in its C-terminal 'tail' has shown to be  
4 essential for interaction with TOPBP1, and required for an effective checkpoint response in  
5 a *Xenopus* system (Lee et al., 2007). Subsequently this phosphorylation was shown to be  
6 dependent on casein kinase 2 (CK2) (Rappas et al., 2011; Takeishi et al., 2010) and its site  
7 of interaction on TOPBP1 localised to BRCT1, with an affinity in the low micromolar range  
8 ( $K_d = 2.1 \mu\text{M}$ ) (Rappas et al., 2011). However, the structural basis for the interaction of RAD9-  
9 pS387 with TOPBP1, and how this directs specificity to just one out of the nine BRCT  
10 domains in TOPBP1 was unclear.

11 Although we previously determined the crystal structure of the N-terminal segment  
12 (BRCT0,1,2) of human TOPBP1 (Rappas et al., 2011) no structures have been reported for  
13 peptide complexes of this region. We have now succeeded in determining the crystal  
14 structure of the BRCT0,1,2 module of chicken TOPBP1 (cTOPBP1) in complex with a peptide  
15 corresponding to the phosphorylated C-terminus of human RAD9 at a resolution of 2.3 Å.

16 As determined by mutagenesis studies (Rappas et al., 2011) the RAD9-pS387 peptide binds  
17 to the middle BRCT domain (BRCT1) of the closely packed array that forms the N-terminus  
18 of cTOPBP1 (**FIGURE 1A**). Unlike phospho-peptide binding to the more commonly occurring  
19 C-terminal tandem BRCT<sub>2</sub> arrangements (Baldock et al., 2015; Kilkenny et al., 2008; Leung  
20 et al., 2011; Rodriguez et al., 2003; Stucki et al., 2005) where the bound peptide bridges  
21 consecutive BRCT domains, the RAD9-pS387 peptide runs perpendicular to the long axis of  
22 the BRCT-domain 'array' and only contacts BRCT1 (**FIGURE 1B**).

23 The phosphate group of RAD9-pSer387 is recognised by a network of hydrogen bonding and  
24 ionic interactions centred around the side-chains of cTOPBP1 residues Thr114, Arg121 and

1 Lys155 which form the conserved triplet common to all BRCT-domains involved in binding  
2 phosphorylated peptide motifs (Wardlaw et al., 2014). In addition to these core polar  
3 interactions with the phosphate, the side chain of RAD9-Asp386 hydrogen bonds to the side  
4 chain of cTOPBP1-Lys118. No ordered electron density was observed for the downstream  
5 Glu-Gly-Glu-Gly sequence that forms the C-terminal tetrapeptide of RAD9. Upstream of  
6 pSer387 and Asp386 (-1, relative to phosphorylated residue), the peptide backbone of the  
7 RAD9 peptide main chain forms a distorted anti-parallel  $\beta$ -sheet with the main chain of a loop  
8 connecting cTOPBP1 residues 137-141, with an additional interaction between the side chain  
9 of cTOPBP1-Asp138 and the peptide nitrogen of RAD9-Asp386 (**FIGURE 1C**). The effect of  
10 these main chain interactions is to twist the peptide into a tight turn, which projects the  
11 sequential side chains of RAD9 residues Leu383 (-4) and Ala384 (-3) into a hydrophobic  
12 pocket lined by the side chains of cTOPBP1 residues Lys154, Lys155, Val158, Leu162,  
13 Leu139 and Met141. All the cTOPBP1 residues involved in binding the RAD9 peptide are  
14 identical in the human protein, except Met141 which is a valine in human TOPBP1. The tight  
15 turn conformation of the RAD9 peptide is reinforced by the hydrophobic side chain of Val382  
16 which packs in against the face of the peptide bond connecting residues Leu383 and Ala384.  
17 To determine which RAD9 residues, in addition to the phosphorylated Ser 387, are important  
18 for binding to TOPBP1, we established a semi-quantitative peptide pull-down assay in which  
19 we systematically varied the identity of the residues at position -5, -4, -3, and -1 relative to  
20 pSer387 (**FIGURE 1D**). Position -3 (Ala in RAD9) retained tight binding only when substituted  
21 by valine, while -4 (Leu in RAD9) tolerated phenylalanine or isoleucine, but with reduced  
22 binding in all cases. Position -5 (Val in RAD9), showed the greatest tolerance, retaining  
23 substantial binding with a range of substitutions, including proline and polar residues such as  
24 serine or glutamine. The side-chain at this position is conformationally unrestricted beyond  
25 the C $\gamma$  position and involved primarily in interactions within the RAD9 peptide itself that

1 reinforce the tight turn conformation delivering the side-chains of residues -3 and -4 into direct  
2 interaction with TOPBP1. The unfavourability of aspartic acid at this position is likely to result  
3 from a repulsive electrostatic interaction with TOPBP1-Asp138.

4

## 5 **Conserved conformations of TOPBP1/Rad4 binding peptides**

6 Although no crystal structures have been reported for phospho-peptides binding to BRCT2  
7 of metazoan TOPBP1, we previously described the interaction of phospho-peptides from  
8 Crb2 (the fission yeast homologue of 53BP1) to both BRCT1 and BRCT2 of Rad4 (the fission  
9 yeast homologue of TOPBP1) (Qu et al., 2013). We have now also determined the crystal  
10 structure of a bis-phosphorylated pT636-pT650 peptide from Sld3 (the fission yeast  
11 homologue of Treslin), which interacts simultaneously with Rad4-BRCT1 and Rad4-BRCT2,  
12 albeit with different molecules in the asymmetric unit of the crystals (**FIGURE 2A**;  
13 **SUPPLEMENTARY FIGURE 1**).

14 Structural alignment of the Rad4 – Sld3-pT636,pT650 complex with the previously described  
15 Rad4 – Crb2-pT187 complex, and the newly described TOPBP1 – RAD9-pS387 complex,  
16 reveals the presence of the same tight turn conformation adopted by the RAD9 peptide (see  
17 above) in all of the peptides bound to BRCT1 (**FIGURE 2B**). Their respective amino acid  
18 sequences reflect this propensity by the strong conservation of a hydrophobic triplet ending  
19 three residues upstream of the phospho-threonine.

20 Conversely, structural alignment of previously described complexes of Rad4 (Qu et al., 2013)  
21 in which peptides are instead bound to BRCT2 (Rad4 - Crb2-pT187 and Rad4 - Crb2-pT235)  
22 with the Rad4 – Sld3-pT636,pT650 complex, confirms a different conformation for the ligand  
23 (**FIGURE 2C**). In these complexes the peptide backbone upstream of the phosphorylated

1 residue maintains a consistent  $\beta$ -sheet conformation, and does not contain the tight turn seen  
2 for the hydrophobic triplets in peptides bound to the BRCT1 domain of TOPBP1 or Rad4.

3

#### 4 **Structural basis for peptide selectivity by BRCT1 and BRCT2**

5 Comparison of the BRCT1 and BRCT2 domains of TOPBP1 and of Rad4 suggests  
6 conserved features that govern the different conformation of their ligand peptides and  
7 contribute to selectivity. A common feature of all TOPBP1/Rad4 BRCT1 or BRCT2 ligands  
8 so far identified, is the presence of a hydrophobic residue at -3 relative to the phosphorylated  
9 serine or threonine. In both BRCT1 and BRCT2 this residue packs into a hydrophobic recess  
10 formed by side chains projecting from the  $\alpha$ -helix connecting the 3<sup>rd</sup> and 4<sup>th</sup>  $\beta$ -strand of the  
11 BRCT fold. In BRCT1 this recess is extended and is sufficiently large to accommodate two  
12 consecutive hydrophobic side chains of a peptide ligand so long as the backbone of the  
13 peptide adopts a tight turn conformation (**FIGURE 3A,B**). In BRCT2 however, the size of the  
14 recess is restricted by the side chain of a highly conserved tryptophan residue (Trp158 in  
15 Rad4; Trp257 in human TOPBP1) at the C-terminal end of the  $\alpha$ -helix, and can only  
16 accommodate a single hydrophobic side chain, requiring that the peptide chain continues in  
17 an extended  $\beta$ -sheet conformation (**FIGURE 3C,D**).

18 Based on the available crystal structures, the major factor that determines binding to BRCT1  
19 seems to be the ability of the peptide sequence upstream of the phosphorylated residue to  
20 form a tight turn that places the side-chains of the -3 and -4 residues into the extended  
21 hydrophobic recess. Sequences with hydrophobic residues at -3 and -4 (and often -5) as in  
22 the RAD9-pS387, Crb2-pT187, Sld3-pT636 and Treslin-pS1001 (993-DIGVVEEpSP)  
23 peptides conform to this requirement, whereas sequences with large polar side chains such  
24 as Crb2-pT235 where -4 is arginine, or Sld3-pT650 where -4 is glutamate, do not, and are



1 restricted to binding to BRCT2. A subtler effect is seen with the Treslin-pT969 site (962-  
2 LTKSVAEpTP), which has a small polar amino acid - serine - at -4, and binds preferentially  
3 to BRCT2 (**FIGURE 3E**) when presented in the context of a short peptide. However, the  
4 unfavourability of the small polar serine, which unlike arginine or glutamate could at least be  
5 sterically accommodated by BRCT1, is diminished in the context of a longer peptide (Boos  
6 et al., 2011). Binding to BRCT2 appears to be less selective beyond the requirement for a  
7 hydrophobic residue at -3. Thus, the Crb2-pT187 sequence is able to bind to Rad4-BRCT2  
8 as well as Rad4-BRCT1 with comparable affinity, as can the Treslin-pS1001 sequence to  
9 TOPBP1-BRCT1 and TOPBP1-BRCT2. However, the ability to bind to BRCT1 does not  
10 guarantee binding to BRCT2, which may depend on the identity of the hydrophobic -3  
11 residue. The RAD9-pS387 sequence for example, binds with low micromolar affinity to  
12 TOPBP1-BRCT1 where its -3 alanine and -4 leucine can effectively occupy the extended  
13 hydrophobic recess, but binds much less tightly to BRCT2 where only the minimal  
14 hydrophobic side-chain of the -3 alanine is available to bind.

15

16 Many (but by no means all) of the sites shown to bind to TOPBP1-BRCT0,1,2 or Rad4-  
17 BRCT1,2 have a proline residue (at +1) following the phosphorylated serine or threonine,  
18 and are known (or presumed to be) targets for phosphorylation by CDKs or other proline-  
19 directed protein kinases (Boos et al., 2011; Qu et al., 2013). In the observed binding modes  
20 for both BRCT1 and BRCT2, the +1 residue is directed away from the body of the protein,  
21 and makes no direct contribution to the binding specificity, but is nonetheless accommodated.

22

23 **Identification of the TOPBP1-BRCT1,2 binding site in RHNO1**

1 Based on the crystal structures described above, and the model for specificity derived from  
2 them, we set out to identify hitherto unrecognised interaction motifs in proteins implicated by  
3 genetic or proteomic studies in interaction with TOPBP1, but where the basis for that  
4 interaction has not been characterised.

5 RHNO1 (aka RHINO, RAD9-Hus1-Rad1 Interacting Nuclear Orphan) was identified as a  
6 contributor to DNA damage checkpoint signalling, which physically couples the 9-1-1 (RAD9-  
7 HUS1-RAD1) checkpoint clamp to TOPBP1 (Cotta-Ramusino et al., 2011; Lindsey-Boltz et  
8 al., 2015). While deletion analysis implicated the N-terminal half of RHNO1 in 9-1-1 binding,  
9 the location of the interaction with TOPBP1 was not defined. Using the TOPBP1-binding  
10 motifs defined above, a search of the human RHNO1 sequence using ScanProsite (de Castro  
11 et al., 2006) identified a good match in the C-terminal region of RHNO1 centred on Thr202  
12 (**FIGURE 4A**). Although not so far annotated in phosphorylation site databases, this  
13 sequence has the characteristics of a proline-directed kinase site such as those identified in  
14 other TOPBP1/Rad4-binding sequences, and with a triplet of hydrophobic residues in the -5,  
15 -4 and -3 positions that would facilitate high-affinity binding to BRCT1 according to our model.  
16 The key attributes of this motif are highly conserved in RHNO1 homologues in metazoa  
17 (**FIGURE S1**).

18 To test the hypothesis that this is a *bona fide* TOPBP1-binding site, we synthesised a  
19 phospho-peptide encapsulating the putative RHNO1-pT202 site and measured its binding to  
20 segments of TOPBP1 using fluorescence polarisation. RHNO1-pT202 bound to TOPBP1-  
21 BRCT0,1,2 with sub-micromolar affinity (**FIGURE 4B**), but did not show any measurable  
22 binding to the other phospho-peptide binding modules of TOPBP1, i.e. BRCT4,5 and  
23 BRCT7,8 (**FIGURE 4C, D**). A dephosphorylated version of the same peptide did not bind.

24 To determine whether RHNO1-pT202 bound BRCT1 or BRCT2 preferentially, we utilised  
25 TOPBP1-BRCT0,1,2 mutants that abrogate phospho-peptide binding to BRCT1 (K155E) or

1 to BRCT2 (K250E). We found that the K250E mutant bound the peptide with comparable  
2 affinity to the wild-type, whereas no binding was observed with the K155E mutant, confirming  
3 TOPBP1-BRCT1 as the major binding site for RHNO1-pT202 (**FIGURE 4B**). Interestingly,  
4 truncation mutations of RHNO1 that eliminate the region of the protein in which this putative  
5 phosphorylation site occurs, and which are therefore unlikely to be unable to bind TOPBP1,  
6 have been identified in a number of families with hereditary pancreatic cancer (Smith et al.,  
7 2016).

8

### 9 **Identification of a novel Rad4-BRCT1,2 binding site in Mdb1**

10 Mdb1 is the *S.pombe* orthologue of the metazoan DNA damage mediator protein MDC1 (Wei  
11 et al., 2014) and plays important roles in the DNA damage response. MDC1 is believed to  
12 interact with TOPBP1 through a central region containing six repeats of a degenerate SDT  
13 motif constitutively phosphorylated by CK2, which was originally implicated in mediating  
14 MDC1 interaction with NBS1 (Chapman and Jackson, 2008; Melander et al., 2008). The  
15 putative interaction of this region with TOPBP1 is believed to be mediated by the BRCT4,5  
16 module, but is of significantly lower affinity than that displayed by other biologically significant  
17 phospho-peptide interactions with TOPBP1/Rad4 BRCT domains (Leung et al., 2013).  
18 Furthermore, these repeats do not occur in fission yeast Mdb1 where only a single SDT motif  
19 is evident.

20

21 To determine whether the single SDT site in Mdb1 mediates an interaction with Rad4, we  
22 synthesised a phospho-peptide encapsulating the bis-phosphorylated Mdb1-p216,p218 SDT  
23 site and measured its binding to segments of Rad4 using fluorescence polarisation (**FIGURE**  
24 **5A**). While the Mdb1-p216,p218 peptide bound with sub-micromolar affinity to *S.pombe*

1 Nbs1, consistent with observations in the human system, no binding was observed to either  
2 the BRCT1,2 or BRCT3,4 modules of Rad4.

3 To try and identify other potential phosphorylation sites on Mdb1 that might mediate its  
4 interaction with Rad4, we searched the Mdb1 sequence using ScanProsite as before (de  
5 Castro et al., 2006) and identified a good match to the motifs defined above, centred at a  
6 documented site of phosphorylation (Beltrao et al., 2012; Ullah et al., 2016) on Thr113  
7 (**FIGURE 5B**). The sequence around Mdb1-Thr113 matches the TP/SP proline-directed  
8 kinase consensus and hydrophobic -3 residue seen for many TOPBP1/Rad4 BRCT1 and/or  
9 BRCT2 interacting sites. However, based on the presence of a polar residue, threonine at -4  
10 our model would suggest that this site would not display high-affinity for BRCT1.

11 To characterise the interaction of this putative site with Rad4, we synthesised a  
12 phosphopeptide encapsulating the Mdb1-pT113 site and measured its binding to segments  
13 of Rad4 using fluorescence polarisation as above. We found that the Mdb1-pT113 peptide  
14 bound to Rad4-BRCT1,2 with low micromolar affinity (**FIGURE 5C**) but showed no binding to  
15 Rad4-BRCT3,4, the equivalent of TOPBP1-BRCT4,5 that has been implicated in mediating  
16 MDC1 interactions in the metazoan system (Leung et al., 2013). To determine which BRCT  
17 domains mediate the interaction with Mdb1-pT113, we measured binding to Rad4-BRCT1,2  
18 with mutations in BRCT1 (K56E) or BRCT2 (K155E), and found binding was reduced 20-fold  
19 compared to wild-type with the BRCT2 mutant but was largely unaffected by mutation of  
20 BRCT1 (**FIGURE 5C**).

21 Based on these observations, we were able to obtain a high-resolution crystal structure of  
22 Rad4-BRCT1,2 in complex with the Mdb1-pT113 peptide, confirming the preference for  
23 binding to BRCT2 (**FIGURE 5D**). The structure shows the Mdb1 peptide bound in a very  
24 similar conformation as Crb2-pT187, Crb2-pT235 and Sld3-pT650 peptides bound to this  
25 domain, with the valine at -3 relative to the phospho-threonine packed into the hydrophobic

1 recess, while the polar threonine at -4 that makes the sequence incompatible with BRCT1, is  
2 directed out to solvent by the  $\beta$ -sheet conformation of the peptide backbone.

3 Deletion of Mdb1 only displays significant DNA damage phenotypes in the absence of some  
4 other Rad4-interacting proteins, and further work is required to determine whether the  
5 phosphorylation site we characterise here plays a critical role in Mdb1 function *in vivo*.  
6 However, analogous TOPBP1-binding sites in mammalian MDC1 appear to play an role in  
7 the response to DNA damage in mitotic cells (Ahorner, Jones et al., manuscript submitted).

8

## 9 **DISCUSSION**

10 As well as its eponymous interaction with DNA topoisomerase II (Broderick et al., 2015;  
11 Yamane et al., 1997), TOPBP1 and its homologues have been found to interact in a  
12 phosphorylation-dependent manner with a number of ligand proteins involved in different  
13 aspects of DNA replication and repair. These include, the CMG helicase assembly factor  
14 Treslin/Sld3 (Boos et al., 2011; Kumagai et al., 2010), the DNA damage mediators  
15 53BP1/Crb2 and MDC1 (Cescutti et al., 2010; Qu et al., 2013; Wang et al., 2011), the 9-1-1  
16 DNA damage checkpoint clamp (Delacroix et al., 2007; Furuya et al., 2004), and the DNA  
17 helicases BLM and FANCI (Blackford et al., 2015; Gong et al., 2010). The data presented  
18 here add RHNO1 and the fission yeast homologue of MDC1, Mdb1, to this group, and there  
19 are no doubt further phosphorylation-dependent ligands yet to be identified.

20 While multiple interacting partners of TOPBP1 are known, the interplay between these has  
21 not been studied in depth, and whether multiple ligand proteins participate simultaneously  
22 with the same TOPBP1 scaffolded complex is unknown. Our data reveal clear and distinctive  
23 specificities for ligand binding between the two phosphopeptide-binding sites in the N-  
24 terminal BRCT module, and it is likely that this also applies to the conserved central BRCT

1 module, and to the C-terminal BRCT module, which is only present in metazoa. Based on  
2 this it is feasible that a single TOPBP1 molecule could, for example, simultaneously bind 9-  
3 1-1 (via BRCT1) and BLM (via BRCT5), or a single Rad4 molecule bind Crb2 (via BRCT1  
4 and 2) and 9-1-1 (via BRCT4). Of course, steric constraints imposed by the rest of the ligand  
5 protein outside the phosphopeptide motif, might prevent simultaneous interaction, but  
6 multiple combinations are possible at least in principle.

7 Conversely, the mapped BRCT specificities of some ligands potentially rules out their co-  
8 existence within a TOPBP1/Rad4 scaffolded complex. Thus, both RHNO1 and the RAD9  
9 component of the 9-1-1 clamp selectively bind BRCT1 of TOPBP1 and are therefore unlikely  
10 to be simultaneously bound to the same TOPBP1 molecule, in contradiction of current models  
11 (Lindsey-Boltz et al., 2015). Similarly, Treslin and 9-1-1 in metazoa, or Sld3 and Crb2 in  
12 fission yeast, would be in competition for binding to TOPBP1/Rad4. These competitions may  
13 be resolved by differences in affinity between binding motifs - for example RHNO1-pT202  
14 appears to bind ~10-fold tighter than RAD9-pS387 – and by regulation of the phosphorylation  
15 state of individual ligand sites by cell cycle and/or DNA damage response systems. For  
16 example, while the RAD9-pS387 site is generated by CK2, which is constitutively active  
17 throughout the cell cycle (Pinna, 2002), the potentially competing RHNO1-pT202 site has the  
18 appearance of a CDK site, and its modification and interaction with TOPBP1 might be  
19 restricted to a specific cell cycle phase. Although these models for regulation of  
20 TOPBP1/Rad4 complex formation are appealing, the situation may be further complicated by  
21 the observation that under some circumstances TOPBP1 may be able to oligomerise via  
22 interaction of an AKT-dependent phosphorylation site on one TOPBP1 molecule, with the C-  
23 terminal BRCT7,8 module of another (Liu et al., 2006). Further work will be required to define  
24 the composition of the many different TOPBP1-scaffolded complexes that potentially occur  
25 within living cells.

1 Given the many roles of TOPBP1 in maintaining cell viability in the presence of the genomic  
2 instability that typically accompanies cancer progression, pharmacological disruption of  
3 TOPBP1-BRCT interactions with ligand proteins offers an attractive therapeutic approach.  
4 However, the poor cell-permeability of inhibitors targeting the strongly polar phosphate  
5 interactions on which binding to BRCT domains often depends, has limited progress (Yuan  
6 et al., 2011). The data presented here show that while phosphate interactions are important,  
7 specificity and high-affinity is mediated by a predominantly hydrophobic interaction that  
8 should be much more amenable to competitive blockade by cell-penetrant small molecules.

9

10

## 1 **ACKNOWLEDGEMENTS**

2 We thank Mark Roe for assistance with X-ray data collection, and John Diffley for helpful  
3 discussion and provision of reagents. We are grateful to the Diamond Light Source Ltd.,  
4 Didcot, UK, for access to synchrotron radiation and to the Wellcome Trust for their support of  
5 X-ray diffraction facilities at the University of Sussex. This work was supported by Cancer  
6 Research UK Programme Grants C302/A14532 and C302/A24386 (A.W.O and L.H.P.).

## 7 **AUTHOR CONTRIBUTIONS**

8 Conceptualization: A.W.O. and L.H.P.; Methodology: A.M.C., A.W.O., L.H.P.; Investigation:  
9 M.D., M.R., K.P., A.T.W., C.C., D.B. and A.W.O.; Writing – Original Draft: L.H.P.; Writing –  
10 Review & Editing: M.D., A.W.O., L.H.P.; Visualisation M.D., A.W.O. and L.H.P.; Supervision:  
11 A.W.O. and L.H.P.; Funding Acquisition: A.W.O. and L.H.P.

## 12 **COMPETING INTERESTS**

13 The Authors declare no competing interests.

14



## 1 **EXPERIMENTAL PROCEDURE**

### 2 **Protein Expression and Purification**

3 *E.coli* strain BL21(DE3) was transformed with modified pGEX-6P-1 or pET-15b vectors for  
4 expression of all protein constructs. Transformed bacteria were grown in a shaking  
5 incubator set at 37 °C and 220 rpm in TurboBroth (Molecular Dimensions, Newmarket, UK)  
6 supplemented with the appropriate antibiotic for selection. Protein expression was induced  
7 by the addition of isopropyl  $\beta$ -D-1-thiogalactopyranoside (IPTG).

8 Cell pellets were resuspended in lysis buffer containing 50mM HEPES pH 7.5, 200mM  
9 NaCl and 0.25mM TCEP supplemented with 50U Turbo DNase (ThermoFisher Scientific,  
10 Waltham MA, USA ), disrupted by sonication, and the resulting lysate clarified by  
11 centrifugation at 40,000 x *g* for 60 minutes at 4°C.

12 For HIS and HIS-SUMO-tagged constructs the supernatant was applied to a 5ml HiTrap  
13 TALON crude column (GE Healthcare, Little Chalfont, UK), washed first with buffer  
14 containing 50mM HEPES pH 7.5, 1000mM NaCl, 0.25mM TCEP, and then again with  
15 buffer containing 50mM HEPES pH 7.5, 200mM NaCl, 0.25mM TCEP, 10mM imidazole.  
16 Retained protein was eluted by application of the same buffer supplemented with 250mM  
17 imidazole.

18 For FP experiments, a Superdex 75 16/60 size exclusion column (GE Healthcare) was  
19 used to purify all proteins to > 95% homogeneity in 25mM HEPES pH 7.5, 150mM NaCl,  
20 1mM EDTA, 0.25mM TCEP, 0.02% (v/v) Tween-20.

21 For GST-tagged constructs the supernatant was applied to a 5ml HiTrap GST column (GE  
22 Healthcare), then washed with buffer containing 50mM HEPES pH 7.5, 1000mM NaCl,  
23 0.25mM TCEP. Retained protein was then eluted by application of the lysis buffer  
24 supplemented with 20mM glutathione.

1

2 For FP experiments, a Superdex 200 16/60 size exclusion column (GE Healthcare) was  
3 used to purify all proteins to > 95% homogeneity in 25mM HEPES pH 7.5, 150mM NaCl,  
4 1mM EDTA, 0.25mM TCEP, 0.02% (v/v) Tween-20.

5 For crystallography experiments, affinity purification tags were removed by incubation with  
6 Human SENP1C or Human Rhinovirus 3C proteases to remove HIS-SUMO or GST tags  
7 respectively, before application of the recombinant protein to a Superdex 75 16/60 size  
8 exclusion column (GE Healthcare) equilibrated in buffer containing 10mM HEPES pH 7.5,  
9 100mM NaCl, 0.5mM TCEP.

## 10 Peptide Pull-down Experiments Method

11 Biotinylated *HsRAD9* peptides corresponding to the C-terminal 45 residues of RAD9 were  
12 synthesized with sequences as follows :

pS387 347 – AEPSTVPGT PPPKKFRSLFFG SILAPVRSPQGPSPVLAED**p**SEGEG – 391  
S387 347 – AEPSTVPGT PPPKKFRSLFFG SILAPVRSPQGPSPVLAED**S**EGEG – 391  
S-1 347 – AEPSTVPGT PPPKKFRSLFFG SILAPVRSPQGPSPVLAED**S**pSEGEG – 391  
K-1 347 – AEPSTVPGT PPPKKFRSLFFG SILAPVRSPQGPSPVLAED**K**pSEGEG – 391  
L-1 347 – AEPSTVPGT PPPKKFRSLFFG SILAPVRSPQGPSPVLAED**L**pSEGEG – 391  
S-3 347 – AEPSTVPGT PPPKKFRSLFFG SILAPVRSPQGPSPVLAED**S**pSEGEG – 391  
F-3 347 – AEPSTVPGT PPPKKFRSLFFG SILAPVRSPQGPSPVLAED**F**pSEGEG – 391  
D-3 347 – AEPSTVPGT PPPKKFRSLFFG SILAPVRSPQGPSPVLAED**D**pSEGEG – 391  
G-3 347 – AEPSTVPGT PPPKKFRSLFFG SILAPVRSPQGPSPVLAED**G**pSEGEG – 391  
I-3 347 – AEPSTVPGT PPPKKFRSLFFG SILAPVRSPQGPSPVLAED**I**pSEGEG – 391  
V-3 347 – AEPSTVPGT PPPKKFRSLFFG SILAPVRSPQGPSPVLAED**V**pSEGEG – 391  
S-4 347 – AEPSTVPGT PPPKKFRSLFFG SILAPVRSPQGPSPVLAED**S**pSEGEG – 391  
N-4 347 – AEPSTVPGT PPPKKFRSLFFG SILAPVRSPQGPSPVLAED**N**pSEGEG – 391  
A-4 347 – AEPSTVPGT PPPKKFRSLFFG SILAPVRSPQGPSPVLAED**A**pSEGEG – 391  
F-4 347 – AEPSTVPGT PPPKKFRSLFFG SILAPVRSPQGPSPVLAED**F**pSEGEG – 391  
I-4 347 – AEPSTVPGT PPPKKFRSLFFG SILAPVRSPQGPSPVLAED**I**pSEGEG – 391  
Q-5 347 – AEPSTVPGT PPPKKFRSLFFG SILAPVRSPQGPSPVLAED**Q**pSEGEG – 391  
S-5 347 – AEPSTVPGT PPPKKFRSLFFG SILAPVRSPQGPSPVLAED**S**pSEGEG – 391  
D-5 347 – AEPSTVPGT PPPKKFRSLFFG SILAPVRSPQGPSPVLAED**D**pSEGEG – 391  
F-5 347 – AEPSTVPGT PPPKKFRSLFFG SILAPVRSPQGPSPVLAED**F**pSEGEG – 391

A-5 347 — AEPSTVPGTPPPKKFRSLFFGSILAPVRSPQGPSPALAE

D

SEGE — 391

1

2 For pull-down experiments 10  $\mu$ l streptavidin agarose were saturated with a given peptide in  
3 binding buffer (20 mM HEPES 8.0, 450 mM NaCl, 0.01% Triton, 5% Glycerol, 5 mM MgCl<sub>2</sub>,  
4 5 mM 2-mercaptoethanol). N-Myc6-TEV2-hTOPBP1-1-360 in vitro translated in rabbit  
5 reticulocyte lysate in the presence of 35S-methionine in binding buffer was added and  
6 incubated for 2 h at 4 °C. After washing in binding buffer, inputs and beads were analysed  
7 by SDS PAGE and autoradiography.

## 8 **Fluorescence Polarisation Experiments**

9 Fluorescein-labelled peptides (Peptide Protein Research Ltd, Fareham, UK) at a  
10 concentration of 200nM, were incubated at room temperature with increasing  
11 concentrations of recombinant protein in 25mM HEPES pH 7.5, 150mM NaCl, 1mM EDTA,  
12 0.25mM TCEP, 0.02% (v/v) Tween-20 in a black 96-well polypropylene plate (VWR,  
13 Lutterworth, UK). Fluorescence polarisation was measured in a CLARIOstar multimode  
14 microplate reader (BMG Labtech, Aylesbury, UK). Binding curves represent the mean of 4  
15 independent experiments, with error bars indicating 1 standard deviation. All data were  
16 fitted by non-linear regression, to a one site – specific binding model in Prism 7 for Mac OS  
17 X (v 7.0d, GraphPad Software) in order to calculate the reported dissociation constants  
18 ( $K_d$ ).

## 19 **Crystallisation, Data Collection, Phasing, Model Building and Refinement**

20 Co-crystallisation trials of GgTopBP1-BRCT0,1,2 mixed with a two-fold excess of HsRAD9  
21 peptide (SPVLAED

D

SEGE) were set up in MRC 2 96-well sitting-drop vapour-diffusion  
22 plates by mixing 200nl of 10mg/ml protein solution with 200nl of mother liquor, over a well  
23 volume of 50 $\mu$ l. Crystals that grew from condition Morpheus E9 (100 mM bicine/Trizma

1 base pH 8.5, 300 mM diethyleneglycol, 300 mM triethyleneglycol, 300  
2 mM tetraethyleneglycol, 300 mM pentaethyleneglycol, 10% w/v PEG 20000 and 20% v/v  
3 PEG MME 550) were harvested and plunged into liquid nitrogen.

4 Co-crystallisation trials of *SpRad4*-BRCT1,2 mixed with a two-fold excess of *SpSld3* pT605  
5 pT619 peptide (GYDSILVQApTPRKSSSVITELPDpTPIKMNS) were set up in MRC 2 96-  
6 well sitting-drop vapour-diffusion plates by mixing 200nl of 12mg/ml protein solution with  
7 200nl of mother liquor, over a well volume of 50µl.

8 Co-crystallisation trials of *SpRad4*-BRCT1,2 mixed with a two-fold excess of *SpMdb1*  
9 pT113 peptide (VMTVPNpTPQKPNLQQ) were set up in MRC 2 96-well sitting-drop vapour-  
10 diffusion plates by mixing 200nl of 12mg/ml protein solution with 200nl of mother liquor,  
11 over a well volume of 50µl. Crystals that grew from condition STRUCTURE D1 (200 mM  
12 Sodium acetate trihydrate, 100 mM Tris 8.5 and 30 % w/v PEG 4000) were soaked in  
13 mother liquor with the addition of 25% (v/v) glycerol prior to plugging in liquid nitrogen.

14

15

16

## 1 **FIGURE LEGENDS**

### 2 **Figure 1 Crystal Structure of the TOPBP1 – RAD9 interaction**

3 **A.** Secondary structure cartoon (rainbow coloured N:blue → C:red) of the BRCT0,1,2  
4 module of chicken TOPBP1 bound to the C-terminal tail of human RAD9 (CPK model)  
5 phosphorylated on Ser387.

6 **B.** The RAD9-pS387 peptide binds to a positively charged patch (blue) on BRCT1 of  
7 TOPBP1

8 **C.** Close-up of the TOPBP1 - RAD9 interaction. The negatively charged phosphate group  
9 of RAD9-pSer387 makes multiple hydrogen binding interactions with residues that are  
10 strongly topologically conserved in all phosphopeptide-binding BRCT domains. An  
11 additional polar interaction is provided by RAD9-Asp386. The consecutive  
12 hydrophobic side-chains of RAD9-Leu383 and Ala384 insert into a pocket in TOPBP1-  
13 BRCT1, enabled by their main chains packing against the side chain of Val382, in a  
14 tight turn conformation.

15 **D.** Sub-site preferences of RAD9 tail binding to TOPBP1-BRCT1. Biotinylated peptides  
16 based on the C-terminal residues of *HsRAD9* with or without phosphorylation on  
17 Ser387, and pS387 peptides with single point mutations in positions -1, -3, -4 and -5  
18 relative to the phosphorylated residue, were used to pull-down radiolabelled *in vitro*  
19 translated TOPBP1-BRCT0,1,2 (see Methods), with the relative yields of bound  
20 protein in the autoradiographs reflecting which amino acids can be accommodated at  
21 the different positions in the bound peptide sequence (see text).

22

### 23 **Figure 2. Conserved conformations of BRCT1 and BRCT2 ligands**

- 1       **A.** Crystal structure of the BRCT1,2 module of Rad4, the fission yeast homologue of  
2       TOPBP1, bound simultaneously to peptides from Sld3, the fission yeast homologue  
3       of Treslin, phosphorylated on Thr636 and on Thr650.
- 4       **B.** Montage of crystal structures of phosphopeptide complexes with BRCT1 of TOPBP1  
5       or Rad4 – the sequences of the peptides is shown below. The other BRCT domains  
6       present in the crystals are omitted for clarity. All three examples share a common tight  
7       turn conformation for the -5, -4 and -3 region, as described above for TOPBP1-RAD9.
- 8       **C.** As B, but for BRCT2. Unlike BRCT1, the -5, -4, -3 regions of the bound peptides have  
9       an extended backbone conformation, in which only the hydrophobic side chain at  
10      position -3 binds into a pocket on the BRCT domain.

11

12      **Figure 3.     Structural basis of BRCT domain conformational preferences**

- 13      **A.** Detail of the RAD9-pSer387 peptide bound to TOPBP1-BRCT1, showing the tight  
14      turn conformation adopted by the consecutive hydrophobic residues at positions -5,  
15      -4 and -3 relative to the phosphorylated residue, that positions the side chains of the  
16      -4 and -3 residues in a pocket on the BRCT domain.
- 17      **B.** As A. but for the Sld3-pT636 peptide bound to Rad4-BRCT1.
- 18      **C.** Detail of the Sld3-pT636 peptide bound to Rad4-BRCT2. Unlike the BRCT1 ligand  
19      phosphopeptides, residues -3 and -4 have an extended main chain conformation, so  
20      that only the residue at -3 interacts with the hydrophobic pocket on the BRCT domain,  
21      so that the -4 position can accommodate a large polar amino acid such as glutamic  
22      acid.

1       **D.** The pocket in BRCT2 is constricted relative to that in BRCT1, by the presence of a  
2       tryptophan residue, which is topologically conserved in BRCT2 domains but absent  
3       from BRCT1.

4       **E.** Fluorescence polarisation assay of Treslin-derived phosphopeptides binding to the  
5       TOPBP1-BRCT0,1,2 segment. The Treslin-pT969 peptide, which has a small  
6       hydrophilic residue at -5 binds preferentially to BRCT2, whereas the Treslin-p1001  
7       peptide with a glycine at -5 binds with comparable affinity to either. Both Treslin  
8       phosphopeptides have hydrophobic residues at -3 and -4 positions.

9

#### 10   **Figure 4.    TOPBP1-binding site in RHNO1**

11       **A.** The C-terminal half of the 9-1-1 and TOPBP1-interacting scaffold protein RHNO1,  
12       contains a sequence motif with a potential phosphorylation site at Thr202, that  
13       corresponds closely to the consensus for preferential binding to Rad4/TOPBP1-  
14       BRCT1 or BRCT2

15       **B.** Fluorescence polarisation assay of a RHNO1-derived phosphopeptide binding to the  
16       TOPBP1-BRCT0,1,2 segment. The RHNO1-pT202 peptide binds with high affinity to  
17       the wild-type BRCT0,1,2 construct, but fails to bind when dephosphorylated by  $\lambda$ -  
18       phosphatase. High affinity binding is lost in the presence of disruptive mutations in the  
19       phosphate-binding site of BRCT1, but is unaffected by comparable mutations in  
20       BRCT2.

21       **C.** In contrast to a documented phosphopeptide derived from BLM (Blackford et al.,  
22       2015), the RHNO1-pT202 peptide shows no affinity for the TOPBP1-BRCT4,5  
23       segment.

1       **D.** As C – RHNO1-pT202 shows no affinity for the TOPBP1-BRCT7,8, unlike a  
2       documented phosphopeptide derived from FANCI (Gong et al., 2010).

3       **Figure 5.     Rad4-binding site in Mdb1**

4       **A.** Fluorescence polarisation assay showing that the single SDT site in Mdb1, the fission  
5       yeast homologue of MDC1, does not interact with Rad4-BRCT3,4 as has been  
6       suggested for the SDT sites in human MDC1 with the homologous TOPBP1-BRCT4,5  
7       (Leung et al., 2013; Wang et al., 2011). The Mdb1-SDT site does however interact  
8       with high-affinity with the *S.pombe* homologue of NBS1.

9       **B.** Mdb1 contains a sequence motif with a potential phosphorylation site at Thr 113 that  
10       corresponds closely to the consensus for binding to Rad4/TOPBP1-BRCT2.

11       **C.** Fluorescence polarisation assay of an Mdb1-derived phosphopeptide binding to the  
12       Rad4-BRCT1,2 segment. The RHNO1-pT202 peptide binds with high affinity to the  
13       wild-type BRCT1,2 but only weakly when a disruptive mutation is introduced into the  
14       phosphate-binding site of BRCT2, but is largely unaffected by comparable mutations  
15       in BRCT1. All detectable binding is lost when both BRCT domains are mutated.

16       **D.** Crystal structure of Mdb1-pT113 peptide bound to the BRCT2 domain within the Rad4-  
17       BRCT1,2 module.

18       **E.** Closeup of interactions. As in other complexes with BRCT2, the single hydrophobic  
19       residue at -3 relative to the phosphorylated residue binds into the hydrophobic pocket,  
20       with the main chain for the -2, -3 and -4 residues adopting an extended conformation,  
21       rather than the tight turn seen in interactions with BRCT1.

22



1 REFERENCES

- 2 Baldock, R.A., Day, M., Wilkinson, O.J., Cloney, R., Jeggo, P.A., Oliver, A.W., Watts, F.Z.,  
3 and Pearl, L.H. (2015). ATM Localization and Heterochromatin Repair Depend on Direct  
4 Interaction of the 53BP1-BRCT2 Domain with gammaH2AX. *Cell reports* 13, 2081-2089.
- 5 Beltrao, P., Albanese, V., Kenner, L.R., Swaney, D.L., Burlingame, A., Villen, J., Lim, W.A.,  
6 Fraser, J.S., Frydman, J., and Krogan, N.J. (2012). Systematic functional prioritization of  
7 protein posttranslational modifications. *Cell* 150, 413-425. PMC3404735
- 8 Blackford, A.N., Nieminuszczy, J., Schwab, R.A., Galanty, Y., Jackson, S.P., and  
9 Niedzwiedz, W. (2015). TopBP1 interacts with BLM to maintain genome stability but is  
10 dispensable for preventing BLM degradation. *Molecular cell* 57, 1133-1141. 4374139
- 11 Boos, D., Sanchez-Pulido, L., Rappas, M., Pearl, L.H., Oliver, A.W., Ponting, C.P., and  
12 Diffley, J.F. (2011). Regulation of DNA Replication through Sld3-Dpb11 Interaction Is  
13 Conserved from Yeast to Humans. *Current biology : CB* 21, 1152-1157.
- 14 Broderick, R., Nieminuszczy, J., Blackford, A.N., Winczura, A., and Niedzwiedz, W. (2015).  
15 TOPBP1 recruits TOP2A to ultra-fine anaphase bridges to aid in their resolution. *Nature*  
16 *communications* 6, 6572. 4374157
- 17 Cescutti, R., Negrini, S., Kohzaki, M., and Halazonetis, T.D. (2010). TopBP1 functions with  
18 53BP1 in the G1 DNA damage checkpoint. *Embo J* 29, 3723-3732. 2982761
- 19 Chapman, J.R., and Jackson, S.P. (2008). Phospho-dependent interactions between NBS1  
20 and MDC1 mediate chromatin retention of the MRN complex at sites of DNA damage.  
21 *EMBO reports* 9, 795-801. PMC2442910

- 1 Cotta-Ramusino, C., McDonald, E.R., 3rd, Hurov, K., Sowa, M.E., Harper, J.W., and  
2 Elledge, S.J. (2011). A DNA damage response screen identifies RHINO, a 9-1-1 and  
3 TopBP1 interacting protein required for ATR signaling. *Science* 332, 1313-1317.
- 4 de Castro, E., Sigrist, C.J., Gattiker, A., Bulliard, V., Langendijk-Genevaux, P.S., Gasteiger,  
5 E., Bairoch, A., and Hulo, N. (2006). ScanProsite: detection of PROSITE signature matches  
6 and ProRule-associated functional and structural residues in proteins. *Nucleic Acids Res*  
7 34, W362-365. PMC1538847
- 8 Delacroix, S., Wagner, J.M., Kobayashi, M., Yamamoto, K., and Karnitz, L.M. (2007). The  
9 Rad9-Hus1-Rad1 (9-1-1) clamp activates checkpoint signaling via TopBP1. *Genes &*  
10 *development* 21, 1472-1477.
- 11 Furuya, K., Poitelea, M., Guo, L., Caspari, T., and Carr, A.M. (2004). Chk1 activation  
12 requires Rad9 S/TQ-site phosphorylation to promote association with C-terminal BRCT  
13 domains of Rad4TOPBP1. *Genes & development* 18, 1154-1164.
- 14 Garcia, V., Furuya, K., and Carr, A.M. (2005). Identification and functional analysis of  
15 TopBP1 and its homologs. *DNA repair* 4, 1227-1239.
- 16 Gong, Z., Kim, J.E., Leung, C.C., Glover, J.N., and Chen, J. (2010). BACH1/FANCI acts  
17 with TopBP1 and participates early in DNA replication checkpoint control. *Molecular cell* 37,  
18 438-446.
- 19 Kilkenny, M.L., Dore, A.S., Roe, S.M., Nestoras, K., Ho, J.C., Watts, F.Z., and Pearl, L.H.  
20 (2008). Structural and functional analysis of the Crb2-BRCT2 domain reveals distinct roles  
21 in checkpoint signaling and DNA damage repair. *Genes & development* 22, 2034-2047.  
22 2492745

- 1 Kumagai, A., Lee, J., Yoo, H.Y., and Dunphy, W.G. (2006). TopBP1 activates the ATR-  
2 ATRIP complex. *Cell* 124, 943-955.
- 3 Kumagai, A., Shevchenko, A., and Dunphy, W.G. (2010). Treslin collaborates with TopBP1  
4 in triggering the initiation of DNA replication. *Cell* 140, 349-359. 2857569
- 5 Lee, J., Kumagai, A., and Dunphy, W.G. (2007). The Rad9-Hus1-Rad1 checkpoint clamp  
6 regulates interaction of TopBP1 with ATR. *The Journal of biological chemistry* 282, 28036-  
7 28044.
- 8 Leung, C.C., Gong, Z., Chen, J., and Glover, J.N. (2011). Molecular basis of  
9 BACH1/FANCI recognition by TopBP1 in DNA replication checkpoint control. *The Journal*  
10 *of biological chemistry* 286, 4292-4301. 3039391
- 11 Leung, C.C., Sun, L., Gong, Z., Burkat, M., Edwards, R., Assmus, M., Chen, J., and Glover,  
12 J.N. (2013). Structural insights into recognition of MDC1 by TopBP1 in DNA replication  
13 checkpoint control. *Structure* 21, 1450-1459. PMC3760280
- 14 Lin, S.J., Wardlaw, C.P., Morishita, T., Miyabe, I., Chahwan, C., Caspari, T., Schmidt, U.,  
15 Carr, A.M., and Garcia, V. (2012). The Rad4(TopBP1) ATR-activation domain functions in  
16 G1/S phase in a chromatin-dependent manner. *PLoS Genet* 8, e1002801. 3386226
- 17 Lindsey-Boltz, L.A., Kemp, M.G., Capp, C., and Sancar, A. (2015). RHINO forms a  
18 stoichiometric complex with the 9-1-1 checkpoint clamp and mediates ATR-Chk1 signaling.  
19 *Cell Cycle* 14, 99-108. 4614876
- 20 Liu, K., Paik, J.C., Wang, B., Lin, F.T., and Lin, W.C. (2006). Regulation of TopBP1  
21 oligomerization by Akt/PKB for cell survival. *Embo J* 25, 4795-4807. 1618094

- 1 Melander, F., Bekker-Jensen, S., Falck, J., Bartek, J., Mailand, N., and Lukas, J. (2008).  
2 Phosphorylation of SDT repeats in the MDC1 N terminus triggers retention of NBS1 at the  
3 DNA damage-modified chromatin. *The Journal of cell biology* 181, 213-226. PMC2315670
- 4 Mordes, D.A., Glick, G.G., Zhao, R., and Cortez, D. (2008a). TopBP1 activates ATR  
5 through ATRIP and a PIKK regulatory domain. *Genes & development* 22, 1478-1489.  
6 2418584
- 7 Mordes, D.A., Nam, E.A., and Cortez, D. (2008b). Dpb11 activates the Mec1-Ddc2  
8 complex. *Proceedings of the National Academy of Sciences of the United States of America*  
9 105, 18730-18734. 2596233
- 10 Pinna, L.A. (2002). Protein kinase CK2: a challenge to canons. *Journal of cell science* 115,  
11 3873-3878.
- 12 Qu, M., Rappas, M., Wardlaw, C.P., Garcia, V., Ren, J.Y., Day, M., Carr, A.M., Oliver, A.W.,  
13 Du, L.L., and Pearl, L.H. (2013). Phosphorylation-dependent assembly and coordination of  
14 the DNA damage checkpoint apparatus by Rad4(TopBP1). *Molecular cell* 51, 723-736.  
15 PMC4944838
- 16 Rappas, M., Oliver, A.W., and Pearl, L.H. (2011). Structure and function of the Rad9-  
17 binding region of the DNA-damage checkpoint adaptor TopBP1. *Nucleic Acids Res* 39, 313-  
18 324. PMC3017600
- 19 Rodriguez, M., Yu, X., Chen, J., and Songyang, Z. (2003). Phosphopeptide binding  
20 specificities of BRCA1 COOH-terminal (BRCT) domains. *The Journal of biological*  
21 *chemistry* 278, 52914-52918.

- 1 Smith, A.L., Alirezaie, N., Connor, A., Chan-Seng-Yue, M., Grant, R., Selander, I.,  
2 Bascunana, C., Borgida, A., Hall, A., Whelan, T., Holter, S., McPherson, T., Cleary, S.,  
3 Petersen, G.M., Omeroglu, A., Saloustros, E., McPherson, J., Stein, L.D., Foulkes, W.D.,  
4 Majewski, J., Gallinger, S., and Zogopoulos, G. (2016). Candidate DNA repair susceptibility  
5 genes identified by exome sequencing in high-risk pancreatic cancer. *Cancer Lett* 370, 302-  
6 312.
- 7 Stucki, M., Clapperton, J.A., Mohammad, D., Yaffe, M.B., Smerdon, S.J., and Jackson, S.P.  
8 (2005). MDC1 directly binds phosphorylated histone H2AX to regulate cellular responses to  
9 DNA double-strand breaks. *Cell* 123, 1213-1226.
- 10 Sun, L., Huang, Y., Edwards, R.A., Yang, S., Blackford, A.N., Niedzwiedz, W., and Glover,  
11 J.N.M. (2017). Structural Insight into BLM Recognition by TopBP1. *Structure* 25, 1582-1588  
12 e1583.
- 13 Takeishi, Y., Ohashi, E., Ogawa, K., Masai, H., Obuse, C., and Tsurimoto, T. (2010).  
14 Casein kinase 2-dependent phosphorylation of human Rad9 mediates the interaction  
15 between human Rad9-Hus1-Rad1 complex and TopBP1. *Genes Cells* 15, 761-771.
- 16 Ullah, S., Lin, S., Xu, Y., Deng, W., Ma, L., Zhang, Y., Liu, Z., and Xue, Y. (2016). dbPAF:  
17 an integrative database of protein phosphorylation in animals and fungi. *Scientific reports* 6,  
18 23534. PMC4806352
- 19 Wang, J., Gong, Z., and Chen, J. (2011). MDC1 collaborates with TopBP1 in DNA  
20 replication checkpoint control. *The Journal of cell biology* 193, 267-273. PMC3080258
- 21 Wardlaw, C.P., Carr, A.M., and Oliver, A.W. (2014). TopBP1: A BRCT-scaffold protein  
22 functioning in multiple cellular pathways. *DNA repair* 22, 165-174.

- 1 Wei, Y., Wang, H.T., Zhai, Y., Russell, P., and Du, L.L. (2014). Mdb1, a fission yeast  
2 homolog of human MDC1, modulates DNA damage response and mitotic spindle function.  
3 PLoS One 9, e97028. PMC4013092
- 4 Yamane, K., Kawabata, M., and Tsuruo, T. (1997). A DNA-topoisomerase-II-binding protein  
5 with eight repeating regions similar to DNA-repair enzymes and to a cell-cycle regulator.  
6 Eur J Biochem 250, 794-799.
- 7 Yuan, Z., Kumar, E.A., Campbell, S.J., Palermo, N.Y., Kizhake, S., Mark Glover, J.N., and  
8 Natarajan, A. (2011). Exploiting the P-1 pocket of BRCT domains toward a structure guided  
9 inhibitor design. ACS Med Chem Lett 2, 764-767. PMC3201719

10

**Table S1. Data collection and refinement statistics.**

|                                       | <b>GgTOPBP1-<br/>BRCT0,1,2<br/>HsRAD9-pS387</b> | <b>SpRad4-BRCT1,2<br/>SpSld3-pT636,pT650</b> | <b>SpRad4-BRCT1,2<br/>SpMdb1-pT113</b> |
|---------------------------------------|-------------------------------------------------|----------------------------------------------|----------------------------------------|
| <b>Wavelength</b>                     | 0.91407                                         | 0.9795                                       | 0.97950                                |
| <b>Resolution range</b>               | 32.4 - 2.33 (2.413 - 2.33)                      | 33.22 - 1.773 (1.836 - 1.773)                | 31.94 - 1.77 (1.833 - 1.77)            |
| <b>Space group</b>                    | P 1 21 1                                        | P 21 21 21                                   | P 1 21 1                               |
| <b>Unit cell</b>                      | 59.05 34.07 66.67 90<br>103.57 90               | 39.4 59.17 120.43<br>90.00 90.00 90.00       | 50.17 40 54.96<br>90.00 105.16 90.00   |
| <b>Total reflections</b>              | 33448 (3411)                                    | 80896 (8170)                                 | 50974 (2487)                           |
| <b>Unique reflections</b>             | 11241 (1122)                                    | 27527 (2735)                                 | 19339 (1453)                           |
| <b>Multiplicity</b>                   | 3.0 (3.0)                                       | 2.9 (3.0)                                    | 2.6 (1.7)                              |
| <b>Completeness (%)</b>               | 98.97 (99.12)                                   | 97.90 (99.45)                                | 93.07 (69.24)                          |
| <b>Mean I/sigma(I)</b>                | 9.72 (2.12)                                     | 15.69 (2.08)                                 | 16.52 (2.08)                           |
| <b>Wilson B-factor</b>                | 39.53                                           | 26.18                                        | 20.48                                  |
| <b>R-merge</b>                        | 0.08416 (0.529)                                 | 0.04109 (0.5432)                             | 0.04735 (0.4284)                       |
| <b>R-meas</b>                         | 0.1024 (0.6413)                                 | 0.04996 (0.6616)                             | 0.05807 (0.5743)                       |
| <b>Rpim</b>                           | 0.0575 (0.3581)                                 | 0.02795 (0.3711)                             | 0.03309 (0.3778)                       |
| <b>CC1/2</b>                          | 0.995 (0.658)                                   | 0.02795 (0.3711)                             | 0.998 (0.698)                          |
| <b>CC*</b>                            | 0.999 (0.891)                                   | 1 (0.942)                                    | 1 (0.907)                              |
| <b>Reflections used in refinement</b> | 11241 (1122)                                    | 27524 (2735)                                 | 19338 (1452)                           |
| <b>Reflections used for R-free</b>    | 559 (54)                                        | 1385 (129)                                   | 991 (89)                               |
| <b>R-work</b>                         | 0.2154 (0.2770)                                 | 0.1938 (0.3021)                              | 0.1664 (0.2730)                        |
| <b>R-free</b>                         | 0.2716 (0.3463)                                 | 0.2286 (0.3262)                              | 0.2116 (0.3625)                        |
| <b>CC(work)</b>                       | 0.935 (0.779)                                   | 0.956 (0.866)                                | 0.963 (0.850)                          |
| <b>CC(free)</b>                       | 0.877 (0.492)                                   | 0.953 (0.856)                                | 0.927 (0.715)                          |
| <b>Number of non-hydrogen atoms</b>   | 2112                                            | 1901                                         | 1845                                   |
| <b>Protein residues</b>               | 259                                             | 208                                          | 191                                    |
| <b>RMS(bonds)</b>                     | 0.002                                           | 0.006                                        | 0.007                                  |
| <b>RMS(angles)</b>                    | 0.44                                            | 0.89                                         | 0.83                                   |
| <b>Ramachandran favored (%)</b>       | 96.37                                           | 98.99                                        | 99.45                                  |
| <b>Ramachandran allowed (%)</b>       | 3.63                                            | 0.51                                         | 0.55                                   |
| <b>Ramachandran outliers (%)</b>      | 0                                               | 0.51                                         | 0.00                                   |
| <b>Rotamer outliers (%)</b>           | 1.29                                            | 0.55                                         | 0.00                                   |
| <b>Clashscore</b>                     | 2.69                                            | 5.37                                         | 2.90                                   |
| <b>Average B-factor</b>               | 45.31                                           | 34.31                                        | 22.63                                  |

Statistics for the highest-resolution shell are shown in parentheses.

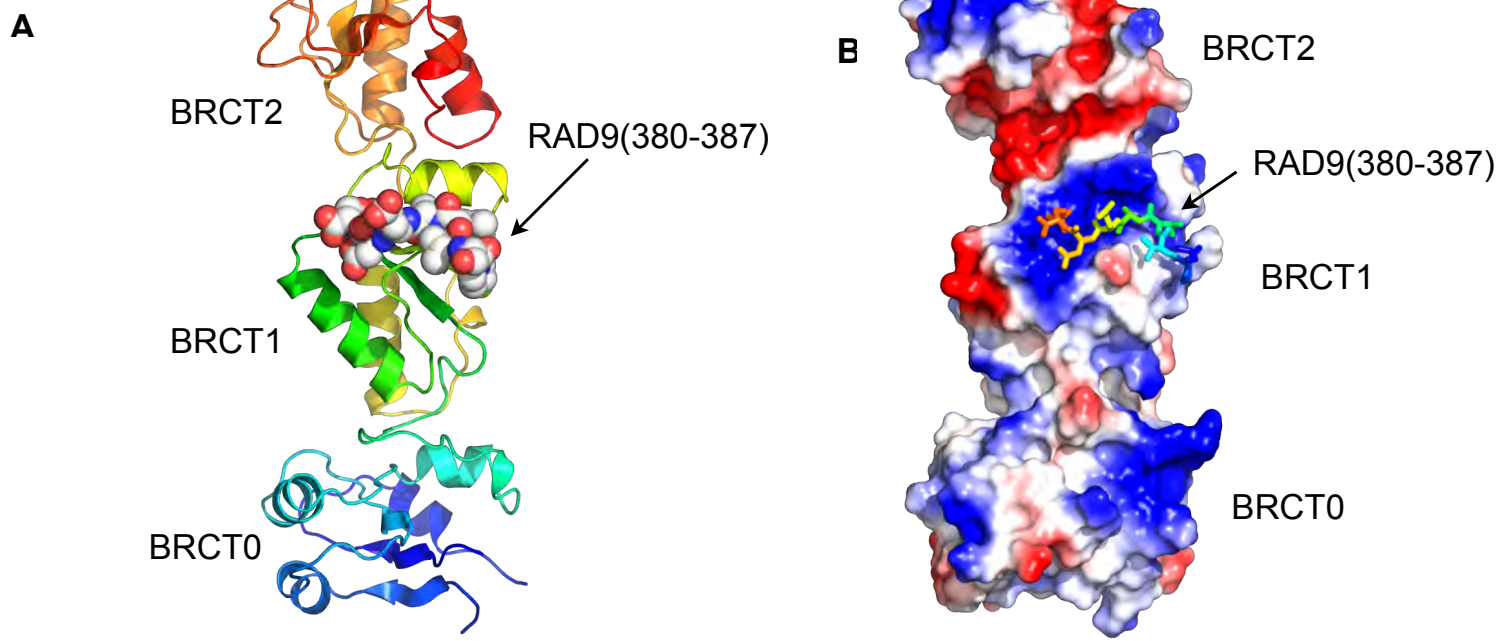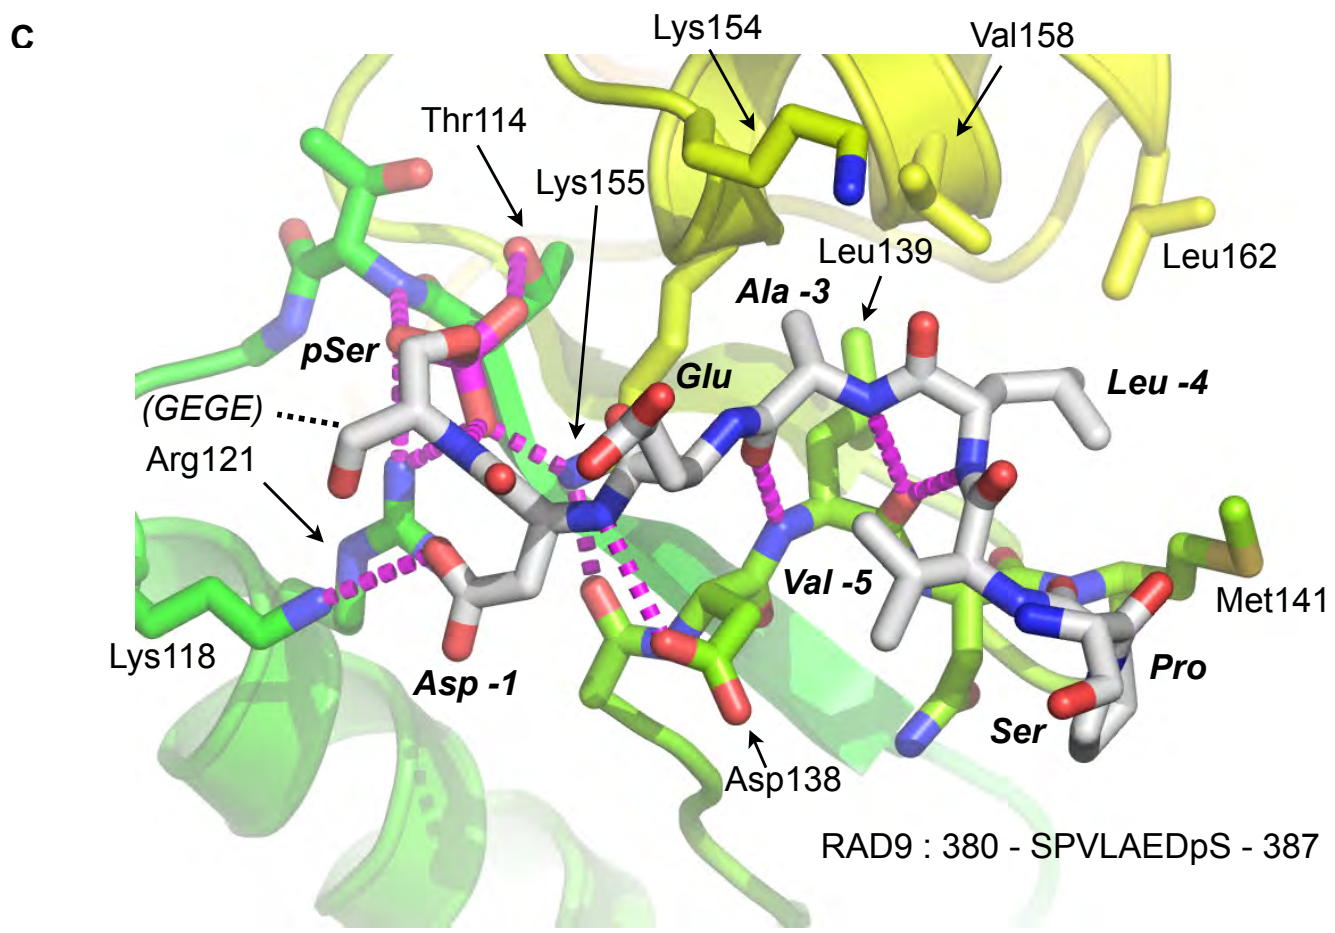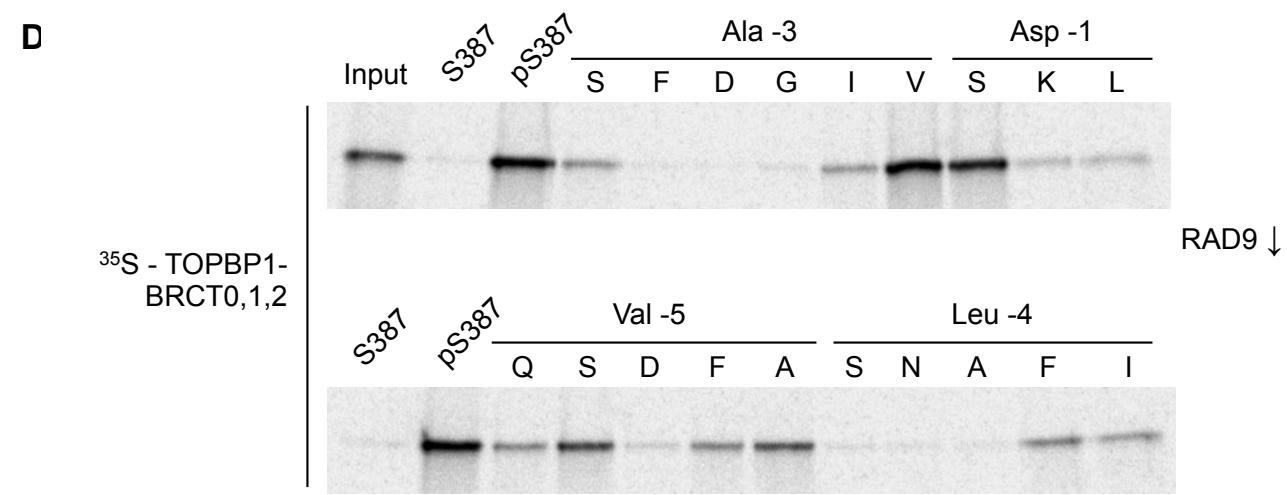



**A**

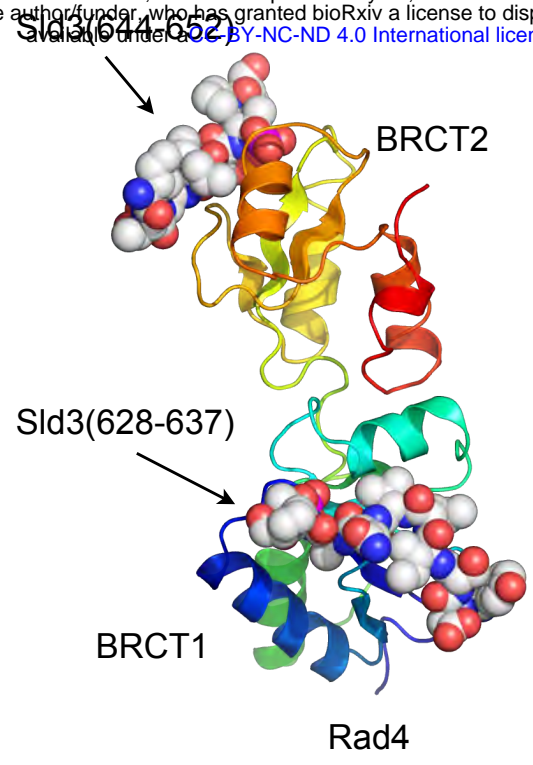

**B**

**BRCT1**

TOPBP1-  
RAD9-pS387

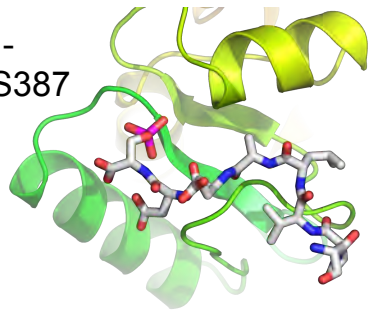

Rad4-  
Crb2-pT187

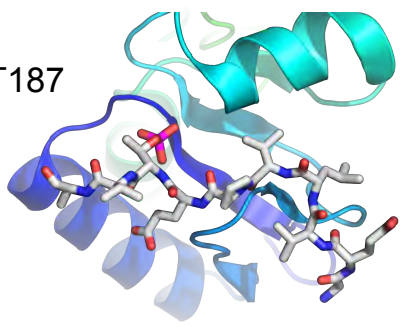

Rad4-  
Sld3-pT636

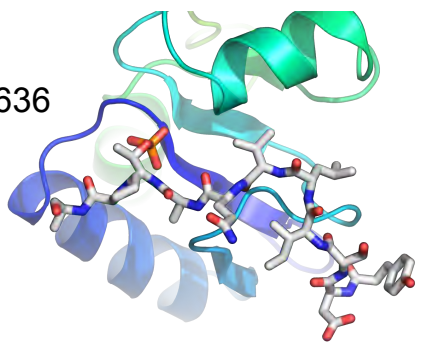

**C**

**BRCT2**

Rad4-  
Crb2-pT235

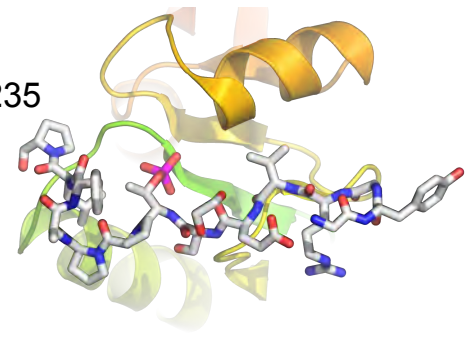

Rad4-  
Crb2-pT187

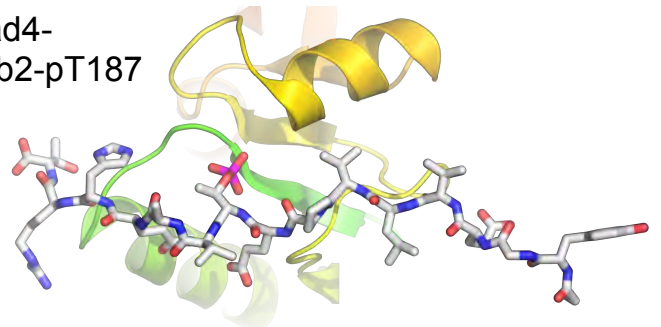

Rad4-  
Sld3-pT650

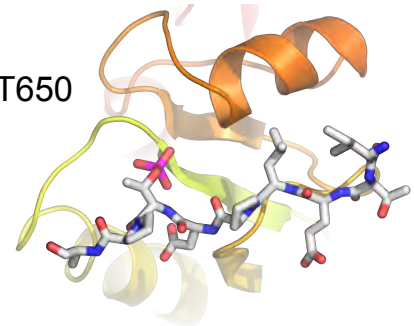

|          | -7 | -6 | -5 | -4 | -3 | -2 | -1 | +1   |
|----------|----|----|----|----|----|----|----|------|
| RAD9-387 | S  | P  | V  | L  | A  | E  | D  | pS E |
| Crb2-187 | G  | E  | V  | L  | V  | P  | E  | pT V |
| Sld3-636 | D  | S  | I  | L  | V  | Q  | A  | pT P |

|          | -7 | -6 | -5 | -4 | -3 | -2 | -1 | +1   |
|----------|----|----|----|----|----|----|----|------|
| Crb2-235 | G  | Y  | G  | R  | V  | E  | S  | pT P |
| Crb2-187 | G  | E  | V  | L  | V  | P  | E  | pT V |
| Sld3-650 | V  | I  | T  | E  | L  | P  | D  | pT P |

# Figure 3

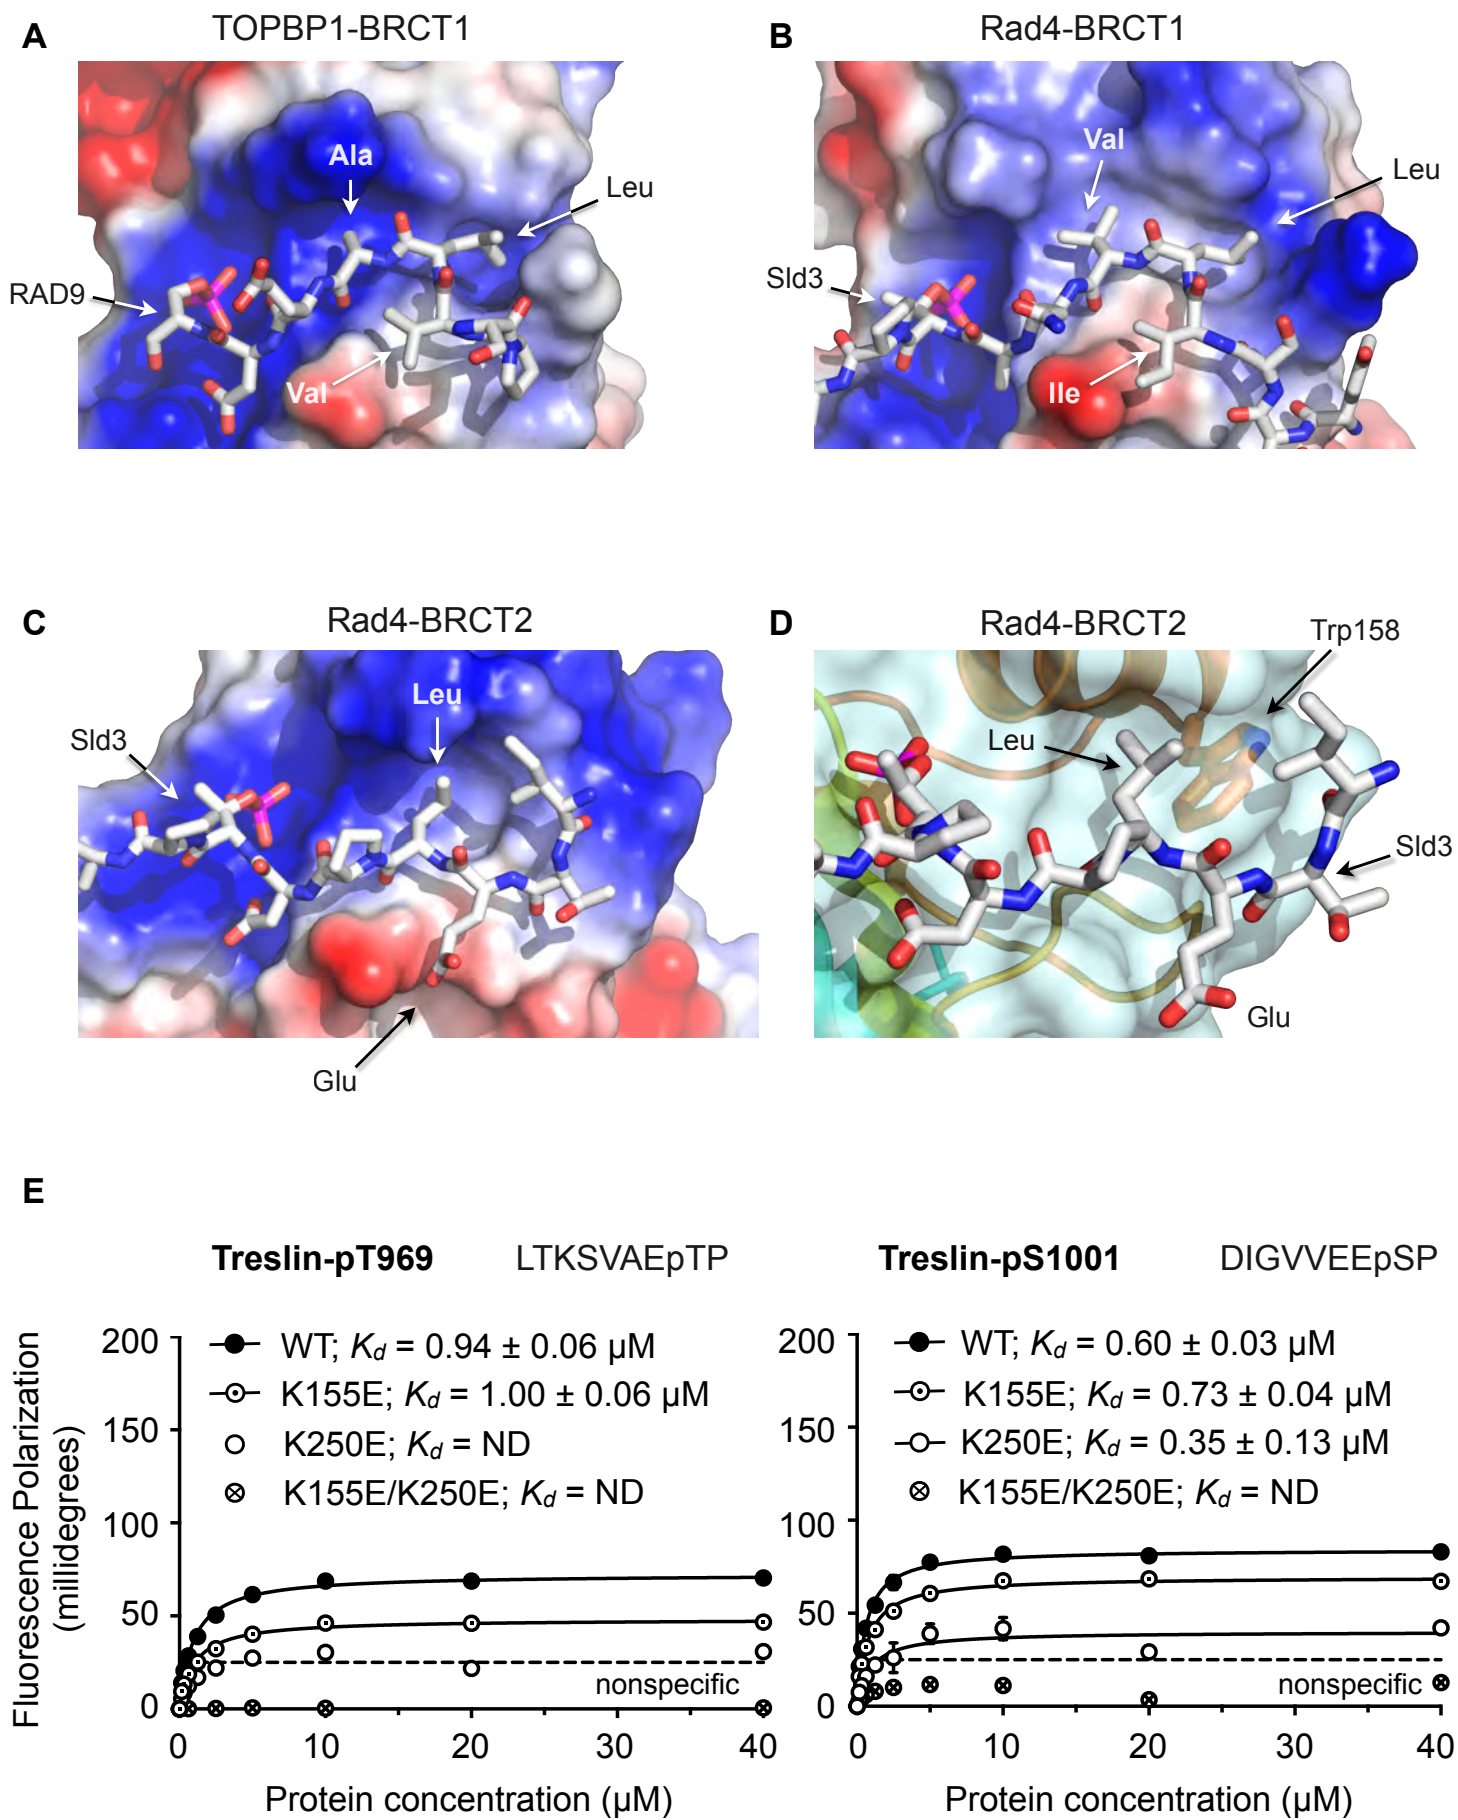

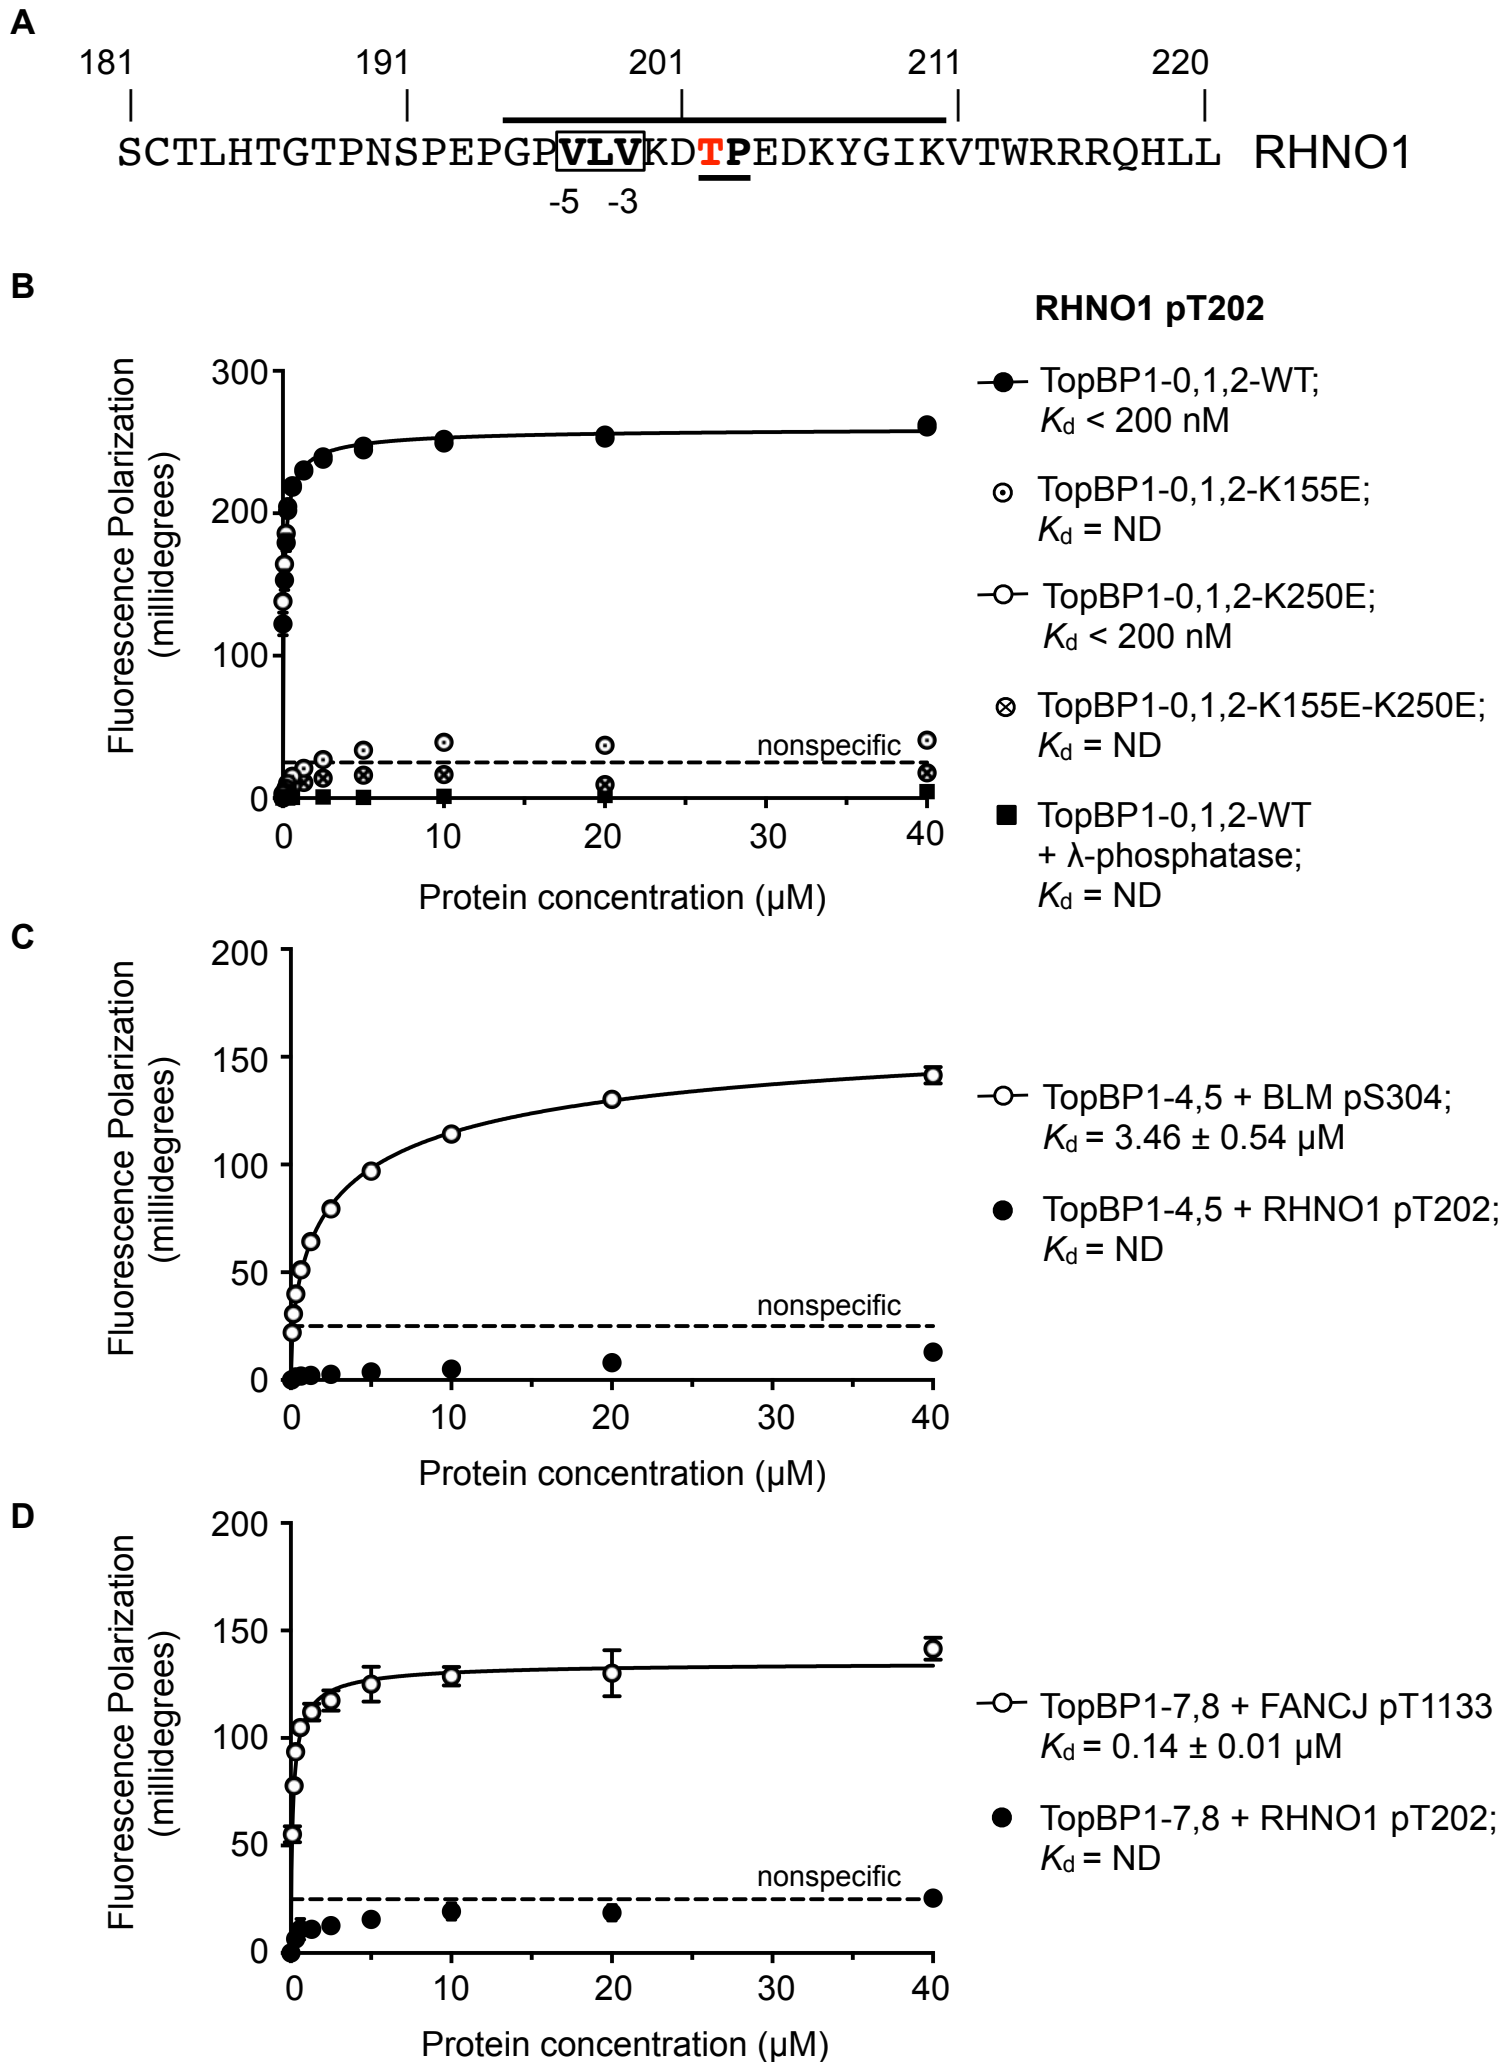

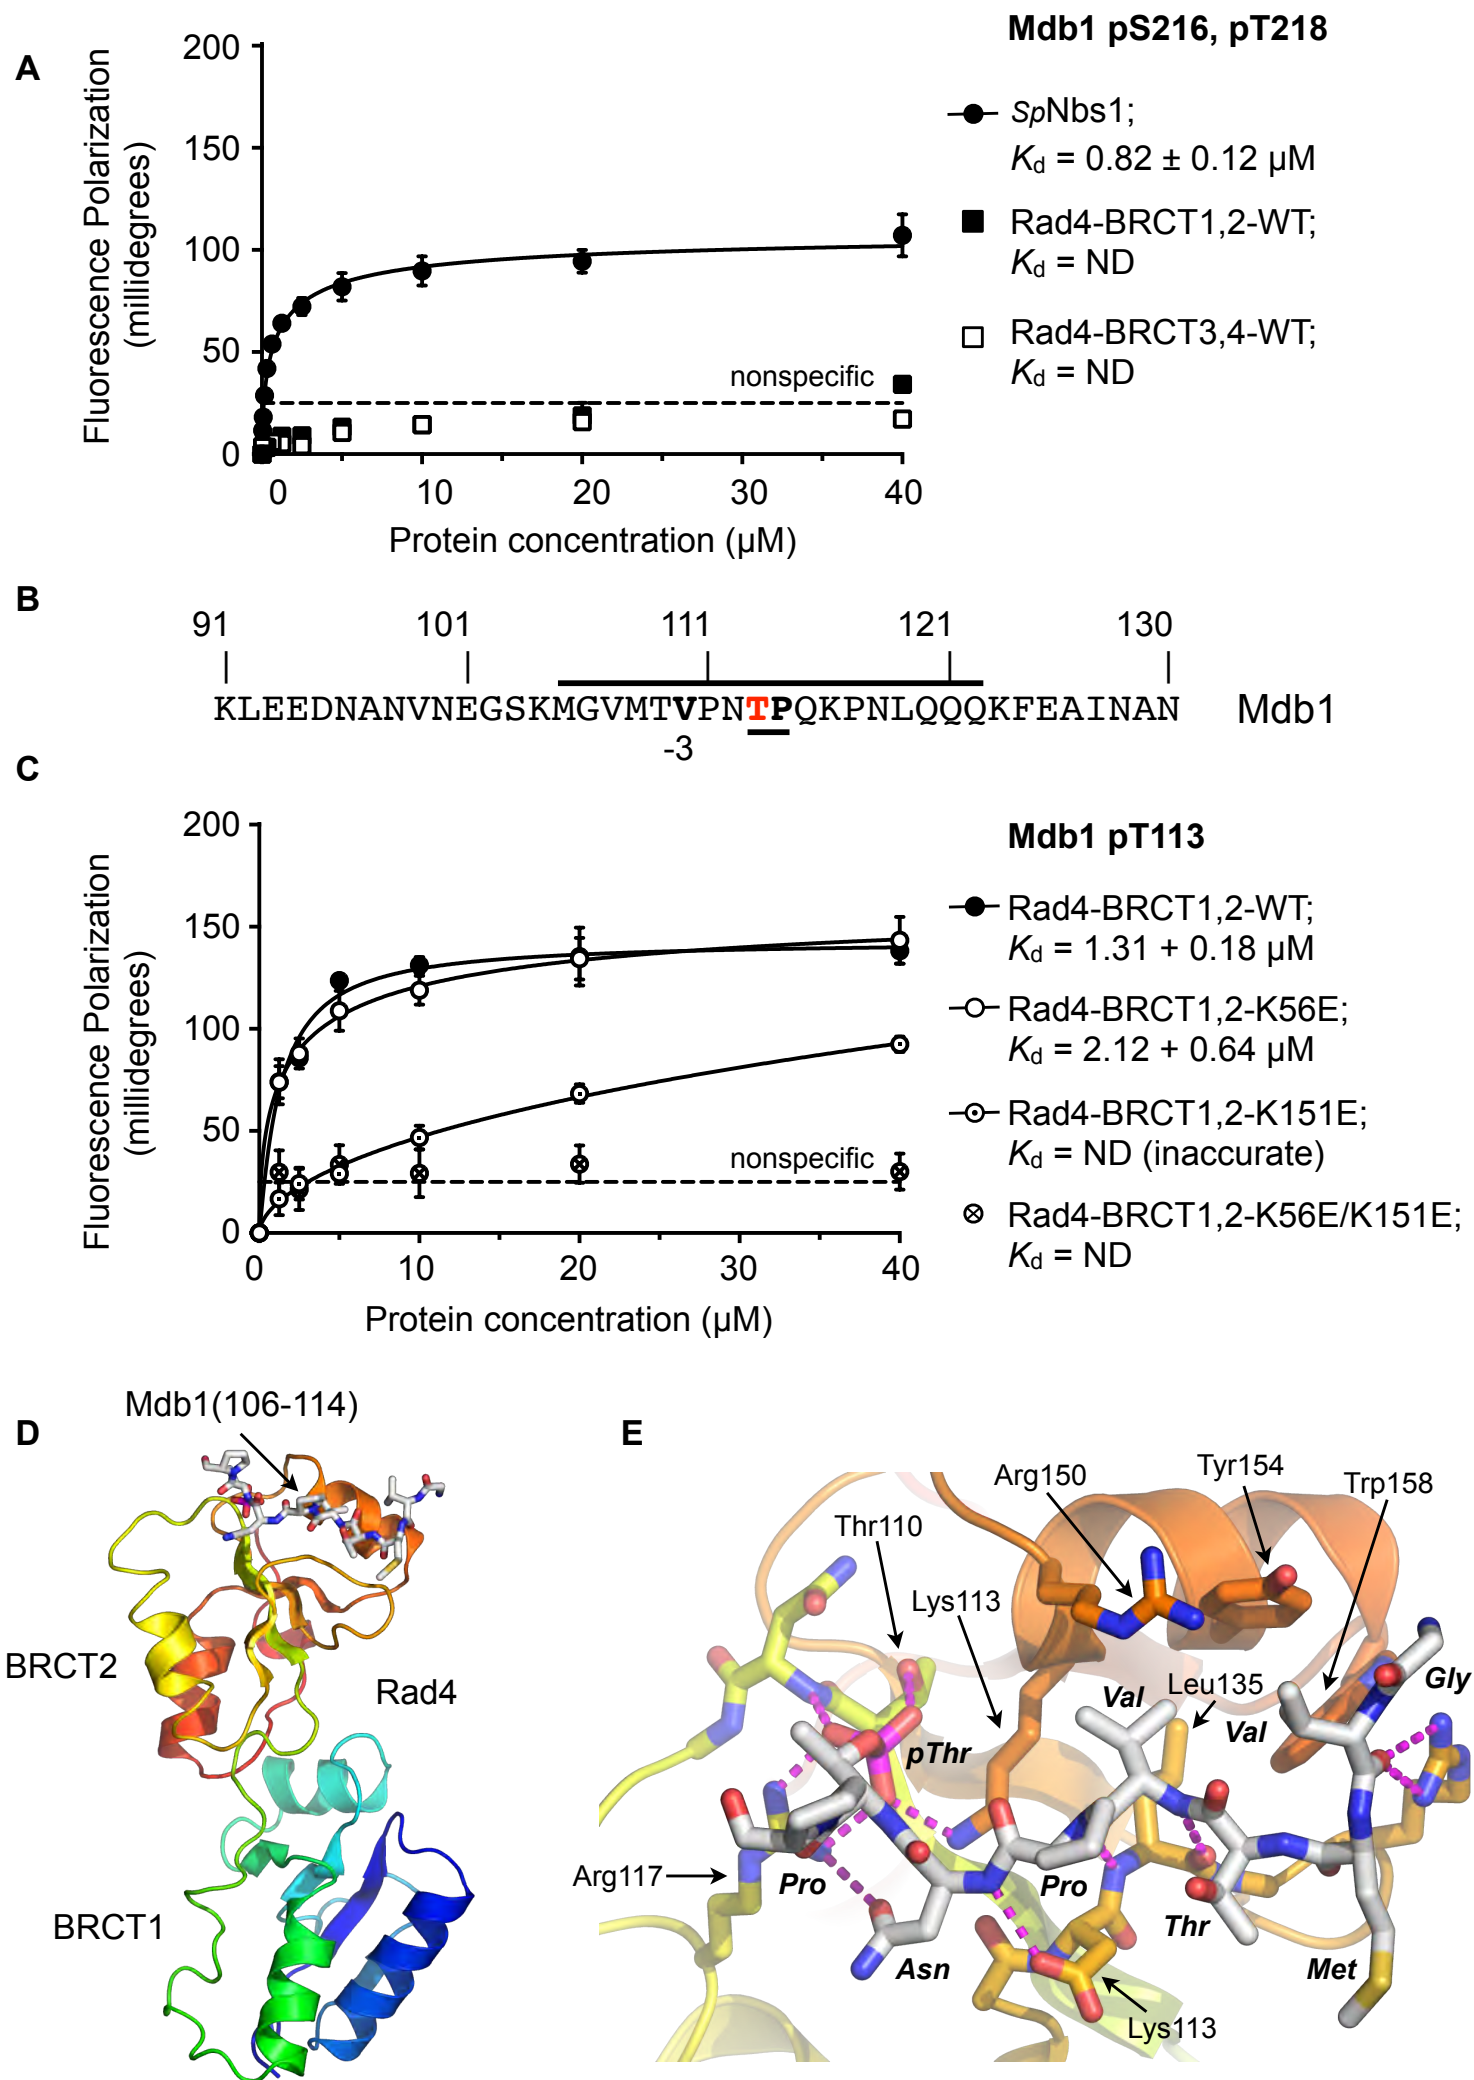

# Figure S1 - conservation of the TOPBP1-interacting phosphorylation site in RHINO homologues

|         |                                                     |     |
|---------|-----------------------------------------------------|-----|
| HUMAN   | PVLVKDTPEDKYGIKVTWRRRQHLLAYLRERGGKLSRSQFLVKS-----   | 238 |
| RAT     | PVLVKDTPPEEKYGIKVTWRRRRHLFAYLKERGGKLDKSQFLVKT-----  | 235 |
| SHEEP   | PVLVKDTPPEEKYGIKVTWRRRRHLFVYLREERGGKLNRSQFLVKD----- | 241 |
| SALMON  | EILATDTPERDYGKVTWRRRKGLMRLGDRGYLSSAEALISI-----      | 316 |
| CHICKEN | ATLVMDTPEREYGIKVTWRHRPHILKYLRDRGGKLSADITVKADLEL---- | 264 |
| OCTOPUS | KILVPDTPEREYGLSVRHRQLGKFKK-----                     | 196 |
| FROG    | RVLVKDTPEREYGLKNT-----                              | 209 |
| TURTLE  | SVLVKDTPPEHEYGKVTWRKRSHLMRYLREKGMSPSDILVKTVTADPSQC  | 278 |
| SCALLOP | KILVLDTPPEAEYGRPARKRQLCLASKETR-----                 | 335 |

*Homo sapiens*

*Rattus norvegicus*

*Ovis aries*

*Salmo salar*

*Gallus gallus*

*Octopus bimaculoides*

*Xenopus laevis*

*Chelonia mydas*

*Mizuhopecten yessoensis*
